# Supplementary material for: Multiple drivers behind mislabeling of fish from artisanal fisheries in La Paz, Mexico
Source: PeerJ. 2021 Jan 29;9:e10750. doi: 10.7717/peerj.10750 (PMC7849509; doi:10.7717/peerj.10750)
Supplement: Supplemental Information 1 — For each sample, we show a unique ID, the GenBank accession number assigned, where the sample was purchased, the commercial name, price (MX) per kilogram (fish markets) or per portion (restaurants), if mislabeling was identified or not and the results of the taxonomic identification of the sample according to BOLD and GenBank databases. Samples are presented in the same order in which commercial species are shown in Fig. 3 and Table 2 in the main text. [file peerj-09-10750-s001.xlsx]

## Sheet: La Paz Seafood
		GenBank	Sold at	Sold as	Price (MX pesos)		Results BOLD (Barcode of life database)			Results GENBANK
No.	Unique ID	Accession	Origin of sample	Commercial name	Per Kg or portion	Mislabeling?	Best match BOLD*	% Similarity		Best ID GENBANK*	Accession number of best match	% identity	Alignment length	mismatches	gap opens	Query start	Query end	Subject start	Subject end	e-value	bit score
1	LPZSF12	MT311532	Restaurant	Jurel	120	Yes	Hoplopagrus guentherii	99.62		Hoplopagrus guentherii	KJ557446.1	99.619	525	2	0	1	525	128	652	0	959
2	LPZSF27	MT311547	Fish market	Jurel	180	Yes	Nematistius pectoralis	100		Nematistius pectoralis	GU440421.1	99.836	609	1	0	1	609	44	652	0	1120
3	LPZSF58	MT311578	Restaurant	Jurel	140	Yes	Caulolatilus princeps	99.83		Caulolatilus princeps	JQ672520.1	99.836	609	1	0	1	609	44	652	0	1120
4	LPZSF75	MT311595	Restaurant	Jurel	59	Yes	Istiompax indica	100		Istiompax indica	MH230959.1	100	609	0	0	1	609	44	652	0	1125
5	LPZSF86	MT311606	Restaurant	Jurel	60	Yes	Thunnus albacares	100		Thunnus albacares	MK216631.1	100	483	0	0	1	483	77	559	0	893
6	LPZSF88	MT311608	Restaurant	Jurel	130	Yes	Sebastes macdonaldi	100		Sebastes macdonaldi	KT307065.1	99.81	525	1	0	1	525	2	526	0	965
7	LPZSF22	MT311542	Restaurant	Jurel	150	Yes	Caulolatilus affinis	100		Caulolatilus affinis	GU440265.1	100	600	0	0	1	600	44	643	0	1109
8	LPZSF10	MT311530	Restaurant	Jurel	140	No	Seriola lalandi	100		Seriola lalandi	KM877615.1	100	594	0	0	1	594	59	652	0	1098
9	LPZSF19	MT311539	Fish market	Jurel	120	No	Seriola lalandi	100		Seriola lalandi	MF167274.1	100	495	0	0	1	495	31	525	0	915
10	LPZSF34	MT311554	Fish market	Jurel	130	No	Seriola lalandi	100		Seriola lalandi	MF167275.1	100	501	0	0	1	501	88	588	0	926
11	LPZSF38	MT311558	Fish market	Jurel	150	No	Seriola lalandi	100		Seriola lalandi	KM877618.1	100	609	0	0	1	609	44	652	0	1125
12	LPZSF40	MT311560	Fish market	Jurel	150	No	Seriola lalandi	100		Seriola lalandi	KM877615.1	100	612	0	0	1	612	44	655	0	1131
13	LPZSF42	MT311562	Fish market	Jurel	150	No	Seriola lalandi	100		Seriola lalandi	MF167274.1	100	516	0	0	1	516	46	561	0	953
14	LPZSF53	MT311573	Fish market	Jurel	150	No	Seriola lalandi	100		Seriola lalandi	KM877615.1	100	567	0	0	1	567	89	655	0	1048
15	LPZSF55	MT311575	Fish market	Jurel	160	No	Seriola lalandi	100		Seriola lalandi	KM877615.1	100	579	0	0	1	579	44	622	0	1070
16	LPZSF93	MT311613	Restaurant	Jurel	155	No	Gnathanodon speciosus	99.83		Gnathanodon speciosus	JX261186.1	99.834	603	1	0	1	603	46	648	0	1109
17	LPZSF120	MT311640	Restaurant	Jurel	40	No	Seriola lalandi	99.83		Seriola lalandi	KM877615.1	99.837	612	1	0	1	612	44	655	0	1125
18	LPZSF123	MT311643	Restaurant	Jurel	120	No	Seriola lalandi	100		Seriola lalandi	KM877615.1	100	567	0	0	1	567	89	655	0	1048
19	LPZSF25	MT311545	Fish market	Jurel	140	No	Seriola lalandi	100		Seriola lalandi	MF167274.1	100	525	0	0	1	525	46	570	0	970
20	LPZSF96	MT311616	Restaurant	Cochito	60	Yes	Oreochromis niloticus	99.5		Oreochromis niloticus	MK628392.1	100	414	0	0	1	414	13	426	0	765
21	LPZSF100	MT311620	Restaurant	Cochito	60	Yes	Oreochromis niloticus	100		Oreochromis niloticus	MK628392.1	100	405	0	0	1	405	13	417	0	749
22	LPZSF98	MT311618	Restaurant	Cochito	95	No	Balistes polylepis	99.46		Balistes polylepis	KF929641.1	99.641	557	2	0	2	558	93	649	0	1018
23	LPZSF107	MT311627	Restaurant	Cochito	195	No	Balistes polylepis	100		Balistes polylepis	KF929641.1	100	519	0	0	1	519	62	580	0	959
24	LPZSF111	MT311631	Restaurant	Cochito	180	No	Balistes polylepis	100		Balistes polylepis	KF929641.1	99.67	606	2	0	1	606	44	649	0	1109
25	LPZSF112	MT311632	Restaurant	Cochito	40	No	Balistes polylepis	99.81		Balistes polylepis	KF929641.1	99.627	536	2	0	1	536	50	585	0	979
26	LPZSF119	MT311639	Fish market	Cochito	130	No	Balistes polylepis	100		Balistes polylepis	KF929641.1	99.672	609	2	0	1	609	44	652	0	1114
27	LPZSF122	MT311642	Fish market	Cochito	80	No	Balistes polylepis	99.67		Balistes polylepis	KF929641.1	99.672	609	2	0	1	609	44	652	0	1114
28	LPZSF06	MT311526	Restaurant	Cochito	65	No	Balistes polylepis	100		Balistes polylepis	KF929641.1	100	534	0	0	1	534	119	652	0	987
29	LPZSF14	MT311534	Fish market	Cochito	100	No	Balistes polylepis	100		Balistes polylepis	KF025673.1	100	513	0	0	1	513	76	588	0	948
30	LPZSF15	MT311535	Fish market	Cochito	85	No	Balistes polylepis	99.83		Balistes polylepis	KF929641.1	99.507	609	3	0	1	609	44	652	0	1109
31	LPZSF17	MT311537	Fish market	Cochito	100	No	Balistes polylepis	99.82		Balistes polylepis	KF929641.1	99.459	555	3	0	1	555	98	652	0	1009
32	LPZSF30	MT311550	Restaurant	Cochito	30	No	Balistes polylepis	99.83		Balistes polylepis	KF929641.1	99.836	609	1	0	1	609	44	652	0	1120
33	LPZSF64	MT311584	Restaurant	Cochito	35	No	Balistes polylepis	100		Balistes polylepis	KF025673.1	100	534	0	0	1	534	70	603	0	987
34	LPZSF69	MT311589	Fish market	Cochito	95	No	Balistes polylepis	100		Balistes polylepis	KF929641.1	100	507	0	0	1	507	83	589	0	937
35	LPZSF71	MT311591	Fish market	Cochito	100	No	Balistes polylepis	99.83		Balistes polylepis	KF929641.1	99.836	609	1	0	1	609	44	652	0	1120
36	LPZSF72	MT311592	Fish market	Cochito	110	No	Balistes polylepis	100		Balistes polylepis	KF929641.1	100	603	0	0	1	603	44	646	0	1114
37	LPZSF74	MT311594	Fish market	Cochito	100	No	Balistes polylepis	99.83		Balistes polylepis	KF929641.1	99.502	603	3	0	1	603	44	646	0	1098
38	LPZSF62	MT311582	Restaurant	Atun	160	Yes	Caulolatilus princeps	100		Caulolatilus princeps	JQ672516.1	100	486	0	0	1	486	134	619	0	898
39	LPZSF20	MT311540	Fish market	Atun	200	No	Thunnus albacares	100		Thunnus albacares	MK216631.1	100	516	0	0	1	516	131	646	0	953
40	LPZSF23	MT311543	Restaurant	Atun	120	No	Thunnus albacares	100		Thunnus albacares	MK216631.1	100	501	0	0	1	501	92	592	0	926
41	LPZSF26	MT311546	Fish market	Atun	200	No	Thunnus albacares	100		Thunnus albacares	MH638778.1	100	579	0	0	1	579	53	631	0	1070
42	LPZSF48	MT311568	Restaurant	Atun	60	No	Thunnus albacares	100		Thunnus albacares	MK216631.1	100	429	0	0	1	429	161	589	0	793
43	LPZSF52	MT311572	Restaurant	Atun	140	No	Thunnus albacares	100		Thunnus albacares	GU451775.1	99.833	600	1	0	1	600	44	643	0	1103
44	LPZSF80	MT311600	Fish market	Atun	200	No	Thunnus albacares	100		Thunnus albacares	MK216631.1	100	558	0	0	1	558	35	592	0	1031
45	LPZSF85	MT311605	Fish market	Atun	200	No	Thunnus albacares	100		Thunnus albacares	LN908910.1	100	591	0	0	1	591	38	628	0	1092
46	LPZSF103	MT311623	Restaurant	Atun	180	No	Thunnus albacares	100		Thunnus albacares	MK216631.1	100	495	0	0	1	495	74	568	0	915
47	LPZSF114	MT311634	Restaurant	Atun	150	No	Thunnus albacares	100		Thunnus albacares	MK216631.1	100	609	0	0	1	609	38	646	0	1125
48	LPZSF116	MT311636	Fish market	Atun	215	No	Thunnus albacares	100		Thunnus albacares	MK216631.1	100	588	0	0	1	588	59	646	0	1086
49	LPZSF04	MT311524	Fish market	Atún	180	No	Thunnus albacares	100		Thunnus albacares	MK216631.1	99.81	525	1	0	1	525	86	610	0	965
50	LPZSF05	MT311525	Restaurant	Atún	190	No	Thunnus albacares	100		Thunnus albacares	MK216631.1	99.828	582	1	0	1	582	59	640	0	1070
51	LPZSF70	MT311590	Fish market	Atun (aleta amarilla)	230	No	Thunnus albacares	100		Thunnus albacares	MK216631.1	99.837	612	1	0	1	612	35	646	0	1125
52	LPZSF102	MT311622	Restaurant	Atun (aleta amarilla)	120	No	Thunnus albacares	100		Thunnus albacares	KY372222.1	100	591	0	0	1	591	31	621	0	1092
53	LPZSF118	MT311638	Fish market	Atun (aleta amarilla)	220	No	Thunnus albacares	100		Thunnus albacares	MK216631.1	99.658	585	2	0	1	585	59	643	0	1070
54	LPZSF21	MT311541	Fish market	Perico	120	Yes	Paranthias colonus	100		Paranthias colonus	GU440449.1	99.662	591	2	0	1	591	44	634	0	1081
55	LPZSF24	MT311544	Fish market	Perico	180	Yes	Atractoscion nobilis	99.66		Atractoscion nobilis	GU440241.1	99.667	600	2	0	1	600	44	643	0	1098
56	LPZSF32	MT311552	Fish market	Perico	150	Yes	Semicossyphus pulcher	100		Semicossyphus pulcher	JQ934979.1	99.835	606	1	0	1	606	58	663	0	1114
57	LPZSF33	MT311553	Fish market	Perico	150	Yes	Acanthurus xanthopterus	99.83		Acanthurus xanthopterus	MG816644.1	99.836	609	1	0	1	609	47	655	0	1120
58	LPZSF44	MT311564	Fish market	Perico	175	Yes	Semicossyphus pulcher	99.83		Semicossyphus pulcher	JQ934979.1	99.837	612	1	0	1	612	58	669	0	1125
59	LPZSF50	MT311570	Fish market	Perico	175	Yes	Semicossyphus pulcher	100		Semicossyphus pulcher	JQ934979.1	99.836	609	1	0	1	609	58	666	0	1120
60	LPZSF56	MT311576	Fish market	Perico	150	Yes	Bodianus diplotaenia	100		Bodianus diplotaenia	KC684983.1	100	609	0	0	1	609	44	652	0	1125
61	LPZSF57	MT311577	Fish market	Perico	160	Yes	Bodianus diplotaenia	100		Bodianus diplotaenia	KC684985.1	99.836	609	1	0	1	609	44	652	0	1120
62	LPZSF95	MT311615	Fish market	Perico	175	Yes	Bodianus diplotaenia	100		Bodianus diplotaenia	KC684983.1	100	495	0	0	1	495	80	574	0	915
63	LPZSF104	MT311624	Fish market	Perico	180	Yes	Diplectrum maximum	100		Diplectrum pacificum	KT149513.1	100	486	0	0	1	486	3	488	0	898
64	LPZSF108	MT311628	Fish market	Perico	175	Yes	Hoplopagrus guentherii	99.83		Hoplopagrus guentherii	KJ557446.1	99.834	603	1	0	1	603	47	649	0	1109
65	LPZSF02	MT311522	Fish market	Perico	170	No	Scarus ghobban	100		Scarus ghobban	EF609452.1	100	534	0	0	1	534	122	655	0	987
66	LPZSF39	MT311559	Fish market	Perico	150	No	Scarus ghobban	100		Scarus ghobban	KC970419.1	99.822	561	1	0	1	561	42	602	0	1031
67	LPZSF83	MT311603	Fish market	Perico	185	No	Scarus rubroviolaceus	99.83		Scarus rubroviolaceus	JQ839578.1	99.655	579	2	0	1	579	68	646	0	1061
68	LPZSF89	MT311609	Fish market	Perico	175	No	Scarus ghobban	100		Scarus ghobban	KC970419.1	100	528	0	0	1	528	120	647	0	976
69	LPZSF61	MT311581	Fish market	Perico	175	No	Scarus ghobban	100		Scarus ghobban	EF609452.1	99.814	537	1	0	1	537	119	655	0	987
70	LPZSF08	MT311528	Restaurant	Cabrilla	90	Yes	Haemulon sp.	99.83		Haemulopsis leuciscus	HQ676766.1	99.667	600	2	0	1	600	43	642	0	1098
71	LPZSF09	MT311529	Restaurant	Cabrilla	65	Yes	Caulolatilus princeps	100		Caulolatilus princeps	JQ672516.1	100	597	0	0	1	597	44	640	0	1103
72	LPZSF16	MT311536	Fish market	Cabrilla	120	Yes	Paranthias colonus	99.83		Paranthias colonus	GU440449.1	99.505	606	3	0	1	606	44	649	0	1103
73	LPZSF36	MT311556	Restaurant	Cabrilla	50	Yes	Thunnus albacares	100		Thunnus albacares	MK216631.1	100	543	0	0	1	543	104	646	0	1003
74	LPZSF51	MT311571	Restaurant	Cabrilla	250	Yes	Caulolatilus princeps	100		Caulolatilus princeps	JQ672516.1	100	606	0	0	1	606	44	649	0	1120
75	LPZSF124	MT311644	Restaurant	Cabrilla	130	Yes	Caulolatilus princeps	100		Caulolatilus princeps	JQ672516.1	99.821	558	1	0	1	558	95	652	0	1026
76	LPZSF13	MT311533	Fish market	Cabrilla (grande)	120	Yes	Paranthias colonus	100		Paranthias colonus	GU440449.1	99.836	609	1	0	1	609	44	652	0	1120
77	LPZSF01	MT311521	Fish market	Cabrilla (mediana)	120	Yes	Paranthias colonus	100		Paranthias colonus	GU440449.1	99.827	579	1	0	1	579	74	652	0	1064
78	LPZSF59	MT311579	Restaurant	Cabrilla (sardinera)	95	Yes	Paranthias colonus	99.82		Paranthias colonus	GU440449.1	99.474	570	3	0	1	570	44	613	0	1037
79	LPZSF07	MT311527	Restaurant	Cabrilla	65	No	Paralabrax nebulifer	100		Paralabrax nebulifer	MK029991.1	100	612	0	0	1	612	50	661	0	1131
80	LPZSF117	MT311637	Restaurant	Cabrilla	140	No	Paralabrax nebulifer	100		Paralabrax nebulifer	KF918889.1	100	585	0	0	1	585	76	660	0	1081
81	LPZSF121	MT311641	Restaurant	Cabrilla	260	No	Mycteroperca rosacea	100		Mycteroperca xenarcha	MH194543.1	95.025	603	30	0	1	603	71	673	0	948
82	LPZSF60	MT311580	Restaurant	Cabrilla	95	No	Paralabrax nebulifer	100		Paralabrax nebulifer	MK029991.1	100	597	0	0	1	597	50	646	0	1103
83	LPZSF11	MT311531	Fish market	Cabrilla (grande)	120	No	Paralabrax auroguttatus	100		Paralabrax auroguttatus	GU440444.1	100	597	0	0	1	597	44	640	0	1103
84	LPZSF76	MT311596	Fish market	Pargo	180	Yes	Bodianus diplotaenia	100		Bodianus diplotaenia	KC684983.1	100	462	0	0	1	462	125	586	0	854
85	LPZSF79	MT311599	Fish market	Pargo	180	Yes	Scarus rubroviolaceus	100		Scarus rubroviolaceus	JQ839578.1	99.834	603	1	0	1	603	44	646	0	1110
86	LPZSF82	MT311602	Fish market	Pargo	180	Yes	Scarus ghobban	100		Scarus ghobban	KU944720.1	100	507	0	0	1	507	34	540	0	937
87	LPZSF97	MT311617	Fish market	Pargo	180	Yes	Scarus compressus	99.8		Scarus sp.	JQ841363.1	94.81	501	26	0	1	501	79	579	0	782
88	LPZSF101	MT311621	Fish market	Pargo	180	Yes	Scarus ghobban	100		Scarus ghobban	KC970419.1	99.486	584	3	0	5	588	46	629	0	1062
89	LPZSF66	MT311586	Fish market	Pargo	180	No	Lutjanus novemfasciatus	100		Lutjanus novemfasciatus	KJ557444.1	100	519	0	0	1	519	134	652	0	959
90	LPZSF87	MT311607	Fish market	Pargo	180	No	Hoplopagrus guentherii	99		Hoplopagrus guentherii	KJ557446.1	99.508	610	1	2	1	609	44	652	0	1109
91	LPZSF90	MT311610	Fish market	Pargo	180	No	Lutjanus novemfasciatus	100		Lutjanus novemfasciatus	KJ557444.1	100	609	0	0	1	609	44	652	0	1125
92	LPZSF91	MT311611	Fish market	Pargo	185	No	Cirrhitus rivulatus	100		Cirrhitus spilotoceps	JX163939.1	87.124	598	75	2	1	597	12	608	0	676
93	LPZSF99	MT311619	Fish market	Pargo	180	No	Hoplopagrus guentherii	98.83		Hoplopagrus guentherii	KJ557446.1	98.689	534	7	0	1	534	44	577	0	948
94	LPZSF49	MT311569	Fish market	Pargo	180	No	Hoplopagrus guentherii	99.17		Hoplopagrus guentherii	KJ557446.1	99.175	606	5	0	1	606	44	649	0	1092
95	LPZSF37	MT311557	Restaurant	Pierna	120	Yes	Haemulon sexfasciatum	100		Haemulon sexfasciatum	EU697543.1	99.835	606	1	0	1	606	44	649	0	1116
96	LPZSF43	MT311563	Restaurant	Pierna	130	Yes	Paranthias colonus	100		Paranthias colonus	GU440449.1	99.665	597	2	0	1	597	47	643	0	1092
97	LPZSF68	MT311588	Fish market	Pierna	100	Yes	Caulolatilus affinis	100		Caulolatilus affinis	GU440265.1	100	606	0	0	1	606	44	649	0	1120
98	LPZSF115	MT311635	Restaurant	Pierna	135	Yes	Mustelus intermedius	100		Mustelus canis	MH379056.1	98.03	609	12	0	1	609	43	651	0	1059
99	LPZSF63	MT311583	Fish market	Pierna	100	No	Caulolatilus princeps	100		Caulolatilus princeps	JQ672520.1	100	504	0	0	1	504	146	649	0	931
100	LPZSF67	MT311587	Fish market	Pierna	100	No	Caulolatilus princeps	100		Caulolatilus princeps	JQ672520.1	100	498	0	0	1	498	146	643	0	920
101	LPZSF35	MT311555	Restaurant	Marlín	32	Yes	Thunnus albacares	100		Thunnus albacares	MK216631.1	100	584	0	0	2	585	63	646	0	1079
102	LPZSF41	MT311561	Fish market	Marlín	150	Yes	Thunnus albacares	99.8		Thunnus albacares	LN908910.1	99.672	609	2	0	1	609	38	646	0	1114
103	LPZSF29	MT311549	Fish market	Marlín	150	No	Kajikia audax	100		Kajikia audax	MH194486.1	100	564	0	0	1	564	108	671	0	1042
104	LPZSF28	MT311548	Fish market	Marlín	160	No	Kajikia audax	100		Kajikia audax	KM055423.1	100	609	0	0	1	609	33	641	0	1125
105	LPZSF45	MT311565	Fish market	Marlín	160	No	Kajikia audax	100		Kajikia audax	HQ024758.1	100	582	0	0	1	582	44	625	0	1075
106	LPZSF73	MT311593	Fish market	Cadernal	120	Yes	Paralabrax loro	100		Paralabrax auroguttatus	GU440444.1	99.833	600	1	0	1	600	53	652	0	1103
107	LPZSF47	MT311567	Fish market	Cadernal	130	No	Paranthias colonus	100		Paranthias colonus	GU440449.1	99.828	582	1	0	1	582	44	625	0	1070
108	LPZSF81	MT311601	Fish market	Cadernal	130	No	Paranthias colonus	100		Paranthias colonus	GU440449.1	99.668	603	2	0	1	603	44	646	0	1103
109	LPZSF46	MT311566	Fish market	Cadernal	130	No	Paranthias colonus	100		Paranthias colonus	GU440449.1	99.313	582	4	0	1	582	44	625	0	1053
110	LPZSF78	MT311598	Restaurant	Sierra	210	Yes	Paranthias colonus	100		Paranthias colonus	GU440449.1	100	600	0	0	1	600	44	643	0	1109
111	LPZSF92	MT311612	Restaurant	Sierra	120	Yes	Lutjanus argentiventris	99.83		Lutjanus argentiventris	KJ557433.1	99.834	603	1	0	1	603	47	649	0	1109
112	LPZSF94	MT311614	Restaurant	Sierra	120	Yes	Gnathanodon speciosus	98.11		Gnathanodon speciosus	JX261186.1	98.018	555	11	0	1	555	97	651	0	965
113	LPZSF113	MT311633	Restaurant	Sierra	45	Yes	No match			Sufflamen fraenatum	JN313008.1	93.06	562	37	2	1	561	59	619	0	821
114	LPZSF77	MT311597	Restaurant	Totoaba	300	No	Totoaba macdonaldi	100		Totoaba macdonaldi	KP722782.1	99.837	612	1	0	1	612	28	639	0	1125
115	LPZSF110	MT311630	Restaurant	Totoaba	300	No	Totoaba macdonaldi	100		Totoaba macdonaldi	KC208681.1	100	609	0	0	1	609	36	644	0	1125
116	LPZSF03	MT311523	Fish market	Lenguado	170	Yes	Brotula clarkae	100		Brotula barbata	KF461141.1	94.245	556	32	0	1	556	98	653	0	850
117	LPZSF105	MT311625	Fish market	Lenguado	190	No	Paralichthys woolmani	99.83		Paralichthys squamilentus	KF930230.1	90.924	606	55	0	1	606	44	649	0	815
118	LPZSF109	MT311629	Restaurant	Curvina	220	No	Atractoscion nobilis	99.67		Atractoscion nobilis	GU440241.1	99.505	606	3	0	1	606	44	649	0	1103
119	LPZSF65	MT311585	Fish market	Cazón chico	120	No	Mustelus henlei	99.32		Mustelus henlei	KY570345.1	99.117	453	4	0	1	453	126	578	0	815
120	LPZSF18	MT311538	Fish market	Garropa	170	Yes	Paranthias colonus	100		Paranthias colonus	GU440449.1	100	504	0	0	1	504	119	622	0	931
121	LPZSF31	MT311551	Restaurant	Manta	90	No	Dasyatis dipterura	100		Dasyatis brevis	JN184058.1	100	588	0	0	1	588	2333	2920	0	1086
122	LPZSF54	MT311574	Fish market	Pez espada	190	No	Xiphias gladius	100		Xiphias gladius	MK295657.1	99.836	609	1	0	1	609	31	639	0	1120
123	LPZSF84	MT311604	Restaurant	Pez Vela	150	Yes	Thunnus albacares	100		Thunnus albacares	MK216631.1	99.8	501	1	0	1	501	83	583	0	920
124	LPZSF106	MT311626	Fish market	Palometa	150	No	Gnathanodon speciosus	99.5		Gnathanodon speciosus	JX261186.1	99.505	606	3	0	1	606	46	651	0	1103
* When both BOLD and GENEBANK returned distinct species identification within the same genus, we considered the species ID with the highet similarity shown in bold
